# Supplementary material for: Attitudinal and structural drivers of preferred versus actual residential landscapes in a desert city
Source: Springer Nature journal article supplement (doi:10.1007/s11252-020-00928-0), 2020-02-04
Supplement: MOESM1 [file 17708756]

Supplementary Material

**Article title:** Attitudinal and structural drivers of preferred versus actual residential landscapes in a desert city

**Journal name**: Urban Ecosystems

**Authors names**: Megan M. Wheeler, Kelli L. Larson, Riley Andrade

**Affiliation and e-mail address of the corresponding author**: School of Life Sciences, Arizona State University, Tempe, AZ 85287, USA. E-mail: mmwheele@asu.edu (ORCID: 0000-0001-5220-9648)

**Supplementary Methods**

*Landscape typology verification*

To validate our revised grass-based yard landscape classification scheme, existing yards were checked against responses to another question asking, “How much of your front [back] yard is covered by grass?” Provided response options were none, less than half, about half, more than half, all grass, and do not have a front/back yard. A small number of respondents gave contradictory answers to the yard grass cover and yard typology questions. We excluded respondents who reported that: they did not have a front/back yard but chose a landscape option (1 front yard), they had a mesic yard but no grass (1 front yard, 4 back yards) or an oasis yard but no grass (11 front yards, 11 back yards), or they had a xeric, patio, or bare yard with half or more grass (7 front yards, 11 back yards). These exclusions were also reflected in the parcel-scale typology, with parcels removed if either front or back yards were not validated through cross referencing.

**Front and Back Yard Grassiness Models**

We modeled front and back yard grassiness separately using ordinal regression in order to separate out the effects of attitudinal and structural predictors on front and back yards compared to overall parcel grassiness. Complete model results corresponding to Table 7 in the main manuscript are given in Table S1.

Table S1. Ordinal regression model results for preferred and existing yard grassiness, for (a) front yards and (b) back yards. Bolded values are significant in the full model for the specified yard type. Scaled predictors were adjusted by subtracting the mean and dividing by the standard deviation. Models include only respondents living in single family homes.

| **(A) Front Yard** |  | | |  | | |
| --- | --- | --- | --- | --- | --- | --- |
|  | **Preferred Yard** | | | **Existing Yard** | | |
| **Variables** | Coefficient  +/- Std Error | Odds Ratio | P value | Coefficient  +/- Std Error | Odds Ratio | P value |
| Xeric | Oasis | **-4.0 +/- 0.9** |  | **<0.0001** | 1 +/- 1 |  | 0.67 |
| Oasis | Mesic | **-2.7 +/- 0.9** |  | **0.003** | 2 +/- 1 |  | 0.14 |
| *Attitudinal* |  |  |  |  |  |  |
| Pro-ecological worldview | -0.2 +/- 0.2 | 0.83 | 0.34 | -0.1 +/- 0.3 | 0.91 | 0.72 |
| Desert attitudes | **-0.7 +/- 0.1** | **0.49** | **<0.0001** | -0.3 +/- 0.2 | 0.74 | 0.11 |
| Politically liberal | -0.05 +/- 0.08 | 0.95 | 0.55 | 0.0 +/- 0.1 | 1.05 | 0.64 |
| *Social Structural* |  |  |  |  |  |  |
| Income | -0.05 +/- 0.05 | 0.95 | 0.23 | 0.07 +/- 0.06 | 1.07 | 0.25 |
| Age (scaled) | **-0.4 +/- 0.1** | **0.70** | **0.01** | **-06 +/- 0.2** | **0.57** | **0.002** |
| % life in Phoenix | 0.2 +/- 0.4 | 1.28 | 0.56 | 0.0 +/- 0.6 | 1.04 | 0.95 |
| Female | 0.2 +/- 0.2 | 1.25 | 0.34 | -0.2 +/- 0.3 | 0.84 | 0.57 |
| Hispanic/Latino | 0.4 +/- 0.3 | 1.47 | 0.20 | **0.9 +/- 0.4** | **2.44** | **0.02** |
| *Parcel Structural* |  |  |  |  |  |  |
| Lot size (scaled) | 0.2  +/- 0.1 | 1.20 | 0.15 | **0.3 +/- 0.1** | **1.36** | **0.03** |
| Home age (scaled) | -0.2 +/- 0.1 | 0.83 | 0.14 | **0.3 +/- 0. 2** | **1.38** | **0.04** |
| Have pool | **-0.6 +/- 0.3** | **0.56** | **0.04** | -0.4 +/- 0.4 | 0.65 | 0.26 |
| *Model sample size* | 319 |  |  | 299 |  |  |
|  |  |  |  |  |  |  |
| **(B) Back Yard** |  |  |  |  |  |  |
|  | **Preferred Yard** | | | **Existing Yard** | | |
| **Variables** | Coefficient  +/- Std Error | Odds Ratio | P value | Coefficient  +/- Std Error | Odds Ratio | P value |
| Xeric | Oasis | **-2.6 +/- 0.8** |  | **0.002** | **2.4 +/- 0.9** |  | **0.01** |
| Oasis | Mesic | -1.0 +/- 0.8 |  | 0.22 | **4 +/- 1** |  | **<0.0001** |
| *Attitudinal* |  |  |  |  |  |  |
| Pro-ecological worldview | -0.2 +/- 0.2 | 0.85 | 0.37 | 0.3 +/- 0.2 | 1.33 | 0.16 |
| Desert attitudes | **-0.4 +/- 0.1** | **0.64** | **0.001** | -0.1 +/- 0.2 | 0.92 | 0.61 |
| Politically liberal | -0.02 +/- 0.07 | 0.98 | 0.77 | 0.07 +/- 0.08 | 1.07 | 0.41 |
| *Social Structural* |  |  |  |  |  |  |
| Income | -0.04 +/- 0.04 | 0.96 | 0.39 | 0.09 +/- 0.05 | 1.10 | 0.05 |
| Age | -0.2 +/- 0.1 | 0.82 | 0.10 | -0. 1 +/- 0.1 | 0.89 | 0.40 |
| % life in Phoenix | **1.1 +/- 0.4** | **3.06** | **0.005** | **1.1 +/- 0.4** | **2.92** | **0.02** |
| Female | 0.1 +/- 0.2 | 1.16 | 0.52 | -0.2 +/- 0.2 | 0.86 | 0.53 |
| Hispanic/Latino | 0.2 +/- 0.3 | 1.28 | 0.41 | 0.2 +/- 0.3 | 0.78 | 0.46 |
| *Parcel Structural* |  |  |  |  |  |  |
| Lot size | 0.1 +/- 0.1 | 1.07 | 0.55 | 0.2 +/- 0.1 | 1.18 | 0.20 |
| Home age | -0.1 +/- 0.1 | 0.86 | 0.24 | -0.1 +/- 0.1 | 0.90 | 0.47 |
| Have pool | -0.1 +/- 0.3 | 0.93 | 0.77 | 0.2 +/- 0.3 | 1.19 | 0.54 |
| *Model sample size* | 317 |  |  | 296 |  |  |

**Parcel-level Grassiness Submodels**

In addition to modeling preferred and existing yard grassiness with the full set of attitudinal, social structural, and parcel structural predictors, we also created submodels with each group of predictors alone. These model results are presented below, with asterisks showing differences in predictor significance from the models with all predictors together.

Table S2. Partial OLS models of parcel-level grassiness for attitudinal variables for preferred and existing yards. Models include only respondents living in single family homes. Bolded values are statistically significant at the p < 0.05 level. Direction and significance of all predictors is the same as in the complete models.

|  | **Preferred Yard** | | | **Existing Yard** | | |
| --- | --- | --- | --- | --- | --- | --- |
| **Variables** | Coefficient  +/- Std Error | Std Beta | P value | Coefficient  +/- Std Error | Std Beta | P value |
| Intercept | **5.6 +/- 0.5** | **0.00** | **<0.0001** | **1.6 +/- 0.4** | **0.00** | **0.0001** |
| *Attitudinal* |  |  |  |  |  |  |
| Pro-ecological worldview | -0.1 +/- 0.1 | -0.07 | 0.23 | 0.1 +/- 0.1 | 0.06 | 0.38 |
| Desert attitudes | **-0.56 +/- 0.09** | **-0.34** | **<0.0001** | -0.05 +/- 0.07 | -0.04 | 0.52 |
| Politically liberal | -0.02 +/- 0.05 | -0.02 | 0.66 | 0.02 +/- 0.04 | 0.04 | 0.56 |
| *Model sample size* | 349 |  |  | 311 |  |  |
| *Adjusted R squared* | 0.1194 |  |  | -0.0026 |  |  |
| *P value* | <0.000001 |  |  | 0.54 |  |  |

Table S3. Partial OLS models of parcel-level grassiness for social structural variables for preferred and existing yards. Models include only respondents living in single family homes. Bolded values are statistically significant at the p < 0.05 level. Direction of all predictors is the same as in the complete model, and models with differing significance between the complete and partial models are marked with *. Income is a statistically significant predictor of preferred yard grassiness and duration of residence in Phoenix is a statistically significant predictor of existing yard grassiness in these models, but not in the complete models. Duration of residence in Phoenix is a statistically significant predictor of preferred yard grassiness in the complete model, but not in this model.

|  | **Preferred Yard** | | | **Existing Yard** | | |
| --- | --- | --- | --- | --- | --- | --- |
| **Variables** | Coefficient  +/- Std Error | Std Beta | P value | Coefficient  +/- Std Error | Std Beta | P value |
| Intercept | **3.7 +/- 0.4** | **0.00** | **<0.0001** | **1.8 +/- 0.3** | **0.00** | **<0.0001** |
| *Social Structural* |  |  |  |  |  |  |
| Income | **-0.08 +/- 0.03** | **0.18** | **0.003*** | 0.03 +/- 0.02 | 0.10 | 0.11 |
| Age | **-0.019 +/- 0.005** | **-0.20** | **0.0003** | **-0.009 +/- 0.004** | **-0.13** | **0.03** |
| % life in Phoenix | 0.4 +/- 0.3 | 0.09 | 0.10* | **0.5 +/- 0.2** | **0.14** | **0.02*** |
| Female | 0.1 +/- 0.2 | 0.03 | 0.54 | -0.1 +/- 0.1 | -0.04 | 0.44 |
| Hispanic/Latino | 0.3 +/- 0.2 | 0.08 | 0.18 | 0.1 +/- 0.2 | 0.04 | 0.53 |
| *Model sample size* | 330 |  |  | 296 |  |  |
| *Adjusted R squared* | 0.1172 |  |  | 0.0375 |  |  |
| *P value* | <0.000001 |  |  | 0.007 |  |  |

Table S4. Partial OLS models of parcel-level grassiness for parcel structural variables for preferred and existing yards. Models include only respondents living in single family homes. Bolded values are statistically significant at the p < 0.05 level. Direction of all predictors is the same as in the complete model, and models with differing significance between the complete and partial models are marked with *. Presence of a pool is a statistically significant predictor of preferred yard grassiness in the partial model, but not in the complete model. Lot size is a statistically significant predictor of existing yard grassiness in the complete model, but not in this model.

|  | **Preferred Yard** | | | **Existing Yard** | | |
| --- | --- | --- | --- | --- | --- | --- |
| **Variables** | Coefficient  +/- Std Error | Std Beta | P value | Coefficient  +/- Std Error | Std Beta | P value |
| Intercept | **3.1 +/- 0.1** | **0.00** | **<0.0001** | **1.7 +/- 0.1** | **0.00** | **<0.0001** |
| *Parcel Structural* |  |  |  |  |  |  |
| Lot size | 0.000003  +/- 0.000008 | 0.02 | 0.67 | 0.000000  +/- 0.000002 | 0.00 | 0.98* |
| Home age | -0.004 +/- 0.003 | -0.06 | 0.25 | 0.005 +/- 0.003 | 0.11 | 0.05 |
| Have pool | **-0.8 +/- 0.2** | **-0.27** | **<0.0001*** | 0.0 +/- 0.1 | -0.01 | 0.90 |
| *Model sample size* | 367 |  |  | 331 |  |  |
| *Adjusted R squared* | 0.0618 |  |  | 0.0029 |  |  |
| *P value* | <0.000001 |  |  | 0.27 |  |  |
